# Supplementary material for: Predictors of positive patient-reported outcomes from ‘Early Intervention in Psychosis’: a national cross-sectional study
Source: HighWire-hosted journal article supplement (doi:10.1136/bmjment-2023-300716), 2023-08-01
Supplement: bmjment-2023-300716supp001_data_supplement.pdf [file bmjment-2023-300716supp001_data_supplement.pdf]

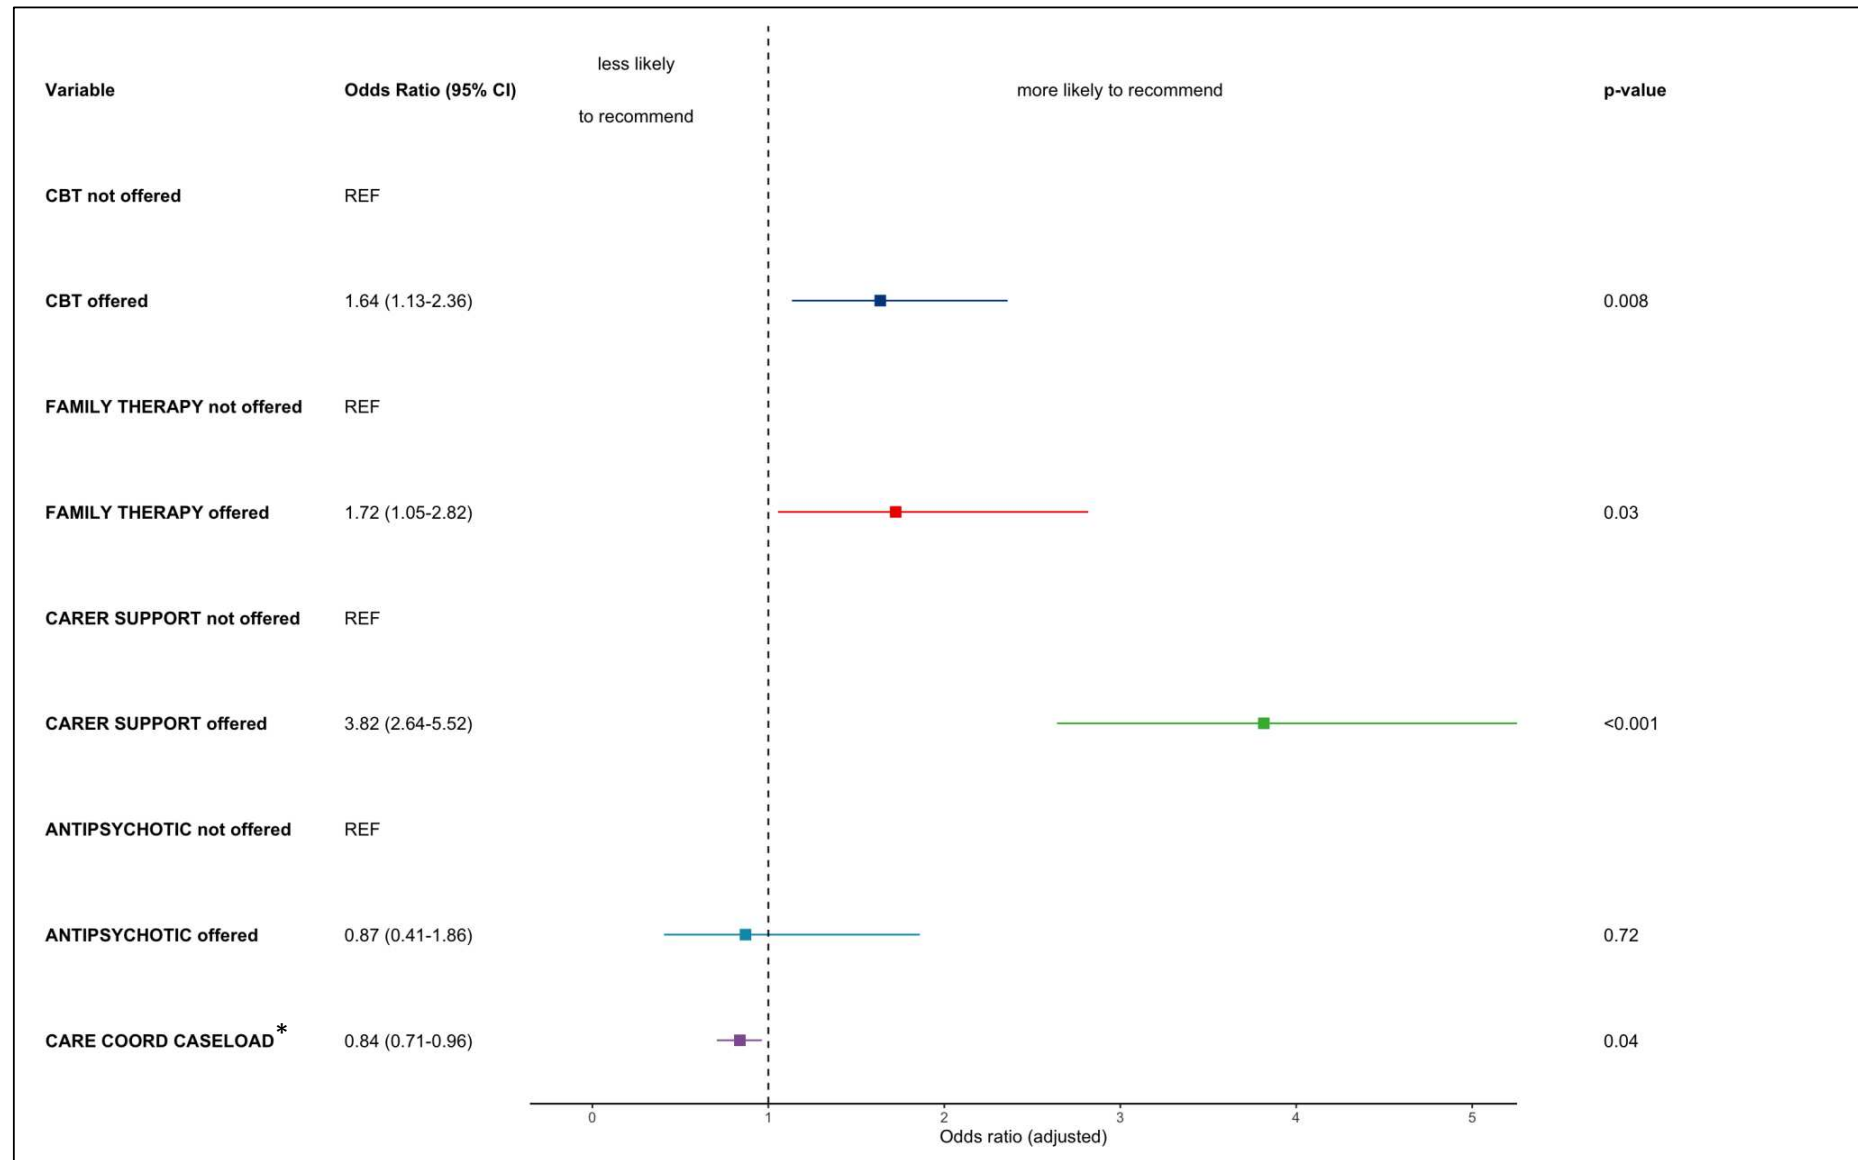

\*plotted odds ratio for 5 unit increase in care coordinator caseload
